# Supplementary material for: Transcriptome Analysis of the Innate Immunity-Related Complement System in Spleen Tissue of Ctenopharyngodon idella Infected with Aeromonas hydrophila
Source: PubMed Central journal article supplement (PMC4934786; doi:10.1371/journal.pone.0157413), 2016-07-06
Supplement: pone.0157413.s005.pdf [file pone.0157413.s005.pdf]

| <b>Sample</b> | <b>Reads</b> | <b>Raw reads</b> | <b>Raw Data (bp)</b> | <b>Q20 (%)</b> | <b>Q30 (%)</b> | <b>GC (%)</b> | <b>Reads Len. (bp)</b> |
|---------------|--------------|------------------|----------------------|----------------|----------------|---------------|------------------------|
| 0             | R1           | 15,469,992       | 4,494,532,178        | 90.22          | 80.47          | 53.04         | 150                    |
|               | R2           | 15,469,992       | 4,494,532,178        |                |                |               |                        |
|               | Paired       | 15,469,992       | 4,494,532,178        |                |                |               |                        |
| 4             | R1           | 19,595,381       | 5,639,822,783        | 90.64          | 81.21          | 51.98         | 150                    |
|               | R2           | 19,595,381       | 5,639,822,783        |                |                |               |                        |
|               | Paired       | 19,595,381       | 5,639,822,783        |                |                |               |                        |
| 8             | R1           | 31,707,453       | 9,212,432,680        | 88.66          | 78.13          | 52.08         | 150                    |
|               | R2           | 31,707,453       | 9,212,432,680        |                |                |               |                        |
|               | Paired       | 31,707,453       | 9,212,432,680        |                |                |               |                        |
| 12            | R1           | 23,391,956       | 6,875,501,359        | 87.75          | 77.01          | 51.79         | 150                    |
|               | R2           | 23,391,956       | 6,875,501,359        |                |                |               |                        |
|               | Paired       | 23,391,956       | 6,875,501,359        |                |                |               |                        |
| 24            | R1           | 23,228,368       | 6,772,712,000        | 90.44          | 80.92          | 52.28         | 150                    |
|               | R2           | 23,228,368       | 6,772,712,000        |                |                |               |                        |
|               | Paired       | 23,228,368       | 6,772,712,000        |                |                |               |                        |
| 48            | R1           | 19,792,133       | 4,857,778,347        | 85.80          | 76.28          | 61.83         | 150                    |
|               | R2           | 19,792,133       | 4,857,778,347        |                |                |               |                        |
|               | Paired       | 19,792,133       | 4,857,778,347        |                |                |               |                        |
| 72            | R1           | 16,329,387       | 4,816,250,934        | 90.01          | 80.09          | 50.84         | 150                    |
|               | R2           | 16,329,387       | 4,816,250,934        |                |                |               |                        |
|               | Paired       | 16,329,387       | 4,816,250,934        |                |                |               |                        |
| Average       | Paired       | 21,359,238.57    | 6,095,575,754        |                |                |               |                        |
| Total         | Paired       | 149,514,670      | 42,669,030,281       |                |                |               |                        |
