# Supplementary material for: Transcriptome Analysis of the Innate Immunity-Related Complement System in Spleen Tissue of Ctenopharyngodon idella Infected with Aeromonas hydrophila
Source: PubMed Central journal article supplement (PMC4934786; doi:10.1371/journal.pone.0157413), 2016-07-06
Supplement: pone.0157413.s006.pdf [file pone.0157413.s006.pdf]

| <b>Sample</b> | <b>Reads</b> | <b>Clean Reads</b> | <b>Clean Data (bp)</b> | <b>Useful Reads (%)</b> | <b>Useful Data (%)</b> |
|---------------|--------------|--------------------|------------------------|-------------------------|------------------------|
| 0             | R1           | 13,187,471         | 3,625,028,377          | 85.25                   | 80.65                  |
|               | R2           | 13,187,471         | 3,625,028,377          |                         |                        |
|               | Paired       | 13,187,471         | 3,625,028,377          |                         |                        |
| 4             | R1           | 16,497,315         | 4,522,164,309          | 84.19                   | 80.18                  |
|               | R2           | 16,497,315         | 4,522,164,309          |                         |                        |
|               | Paired       | 16,497,315         | 4,522,164,309          |                         |                        |
| 8             | R1           | 25,434,348         | 6,890,692,628          | 80.22                   | 74.80                  |
|               | R2           | 25,434,348         | 6,890,692,628          |                         |                        |
|               | Paired       | 25,434,348         | 6,890,692,628          |                         |                        |
| 12            | R1           | 18,271,945         | 5,000,199,754          | 78.11                   | 72.72                  |
|               | R2           | 18,271,945         | 5,000,199,754          |                         |                        |
|               | Paired       | 18,271,945         | 5,000,199,754          |                         |                        |
| 24            | R1           | 19,484,980         | 5,423,853,946          | 83.88                   | 80.08                  |
|               | R2           | 19,484,980         | 5,423,853,946          |                         |                        |
|               | Paired       | 19,484,980         | 5,423,853,946          |                         |                        |
| 48            | R1           | 15,621,029         | 3,563,711,100          | 78.93                   | 73.36                  |
|               | R2           | 15,621,029         | 3,563,711,100          |                         |                        |
|               | Paired       | 15,621,029         | 3,563,711,100          |                         |                        |
| 72            | R1           | 13,684,258         | 3,819,823,592          | 83.80                   | 79.31                  |
|               | R2           | 13,684,258         | 3,819,823,592          |                         |                        |
|               | Paired       | 13,684,258         | 3,819,823,592          |                         |                        |
| Average       | Paired       | 17,454,478         | 4,692,210,529          |                         |                        |
| Total         | Paired       | 122,181,346        | 32,845,473,706         |                         |                        |
